# Supplementary material for: Near-infrared light-responsive shape memory hydrogels with remolding and excellent mechanical performance
Source: Royal Society of Chemistry journal article supplement (doi:10.1039/d2nj00056c), 2022-01-01
Supplement: d2nj00056c1.pdf [file d2nj00056c1.pdf]

Supporting information

**Near-infrared light-responsive shape memory hydrogels with remolding and excellent mechanical performance**

Yang Zou, Pengxiang Wang, Shaokang Fang, Huirong Li, Yue Yu\*, Yuanfa Liu\*, Hong Zhang, Jing Guo.

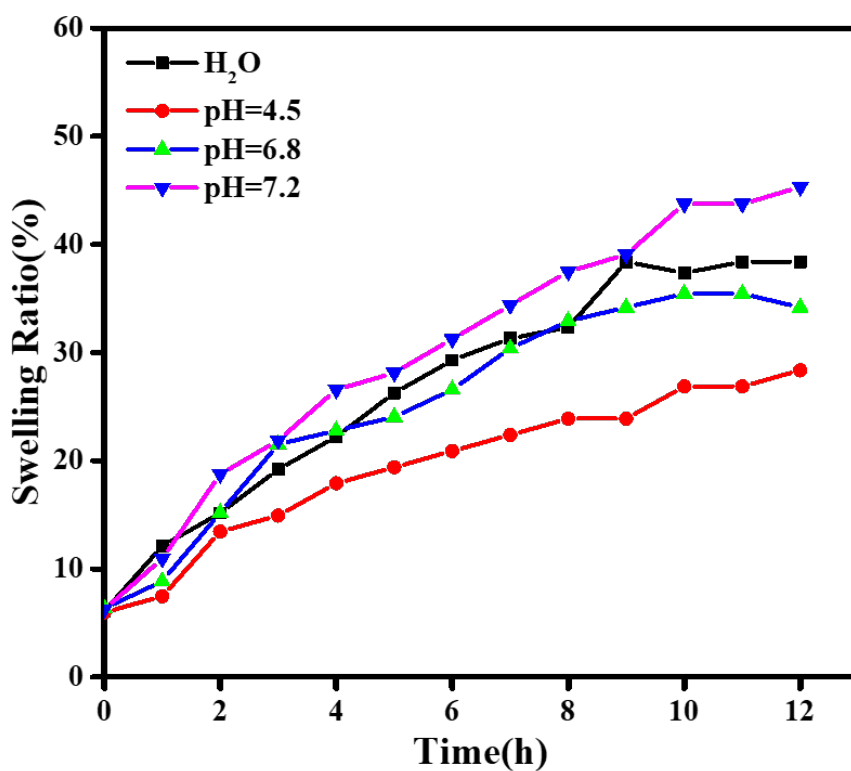

**Figure S1.** Swelling curves of PVA/TA-Fe<sup>3+</sup> hydrogels in DI water and PBS solution with different pH value.

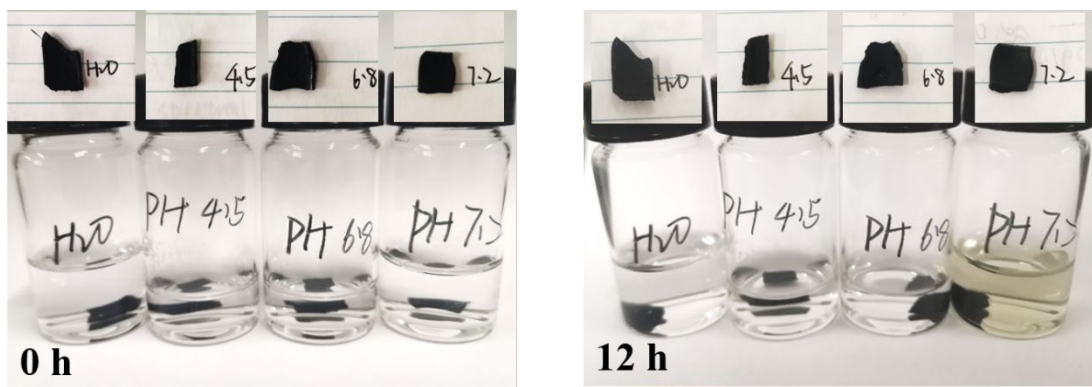

**Figure S2.** Swelling ratio test of PVA/TA-Fe<sup>3+</sup> hydrogels in PBS solutions with different pH value within 12 h.

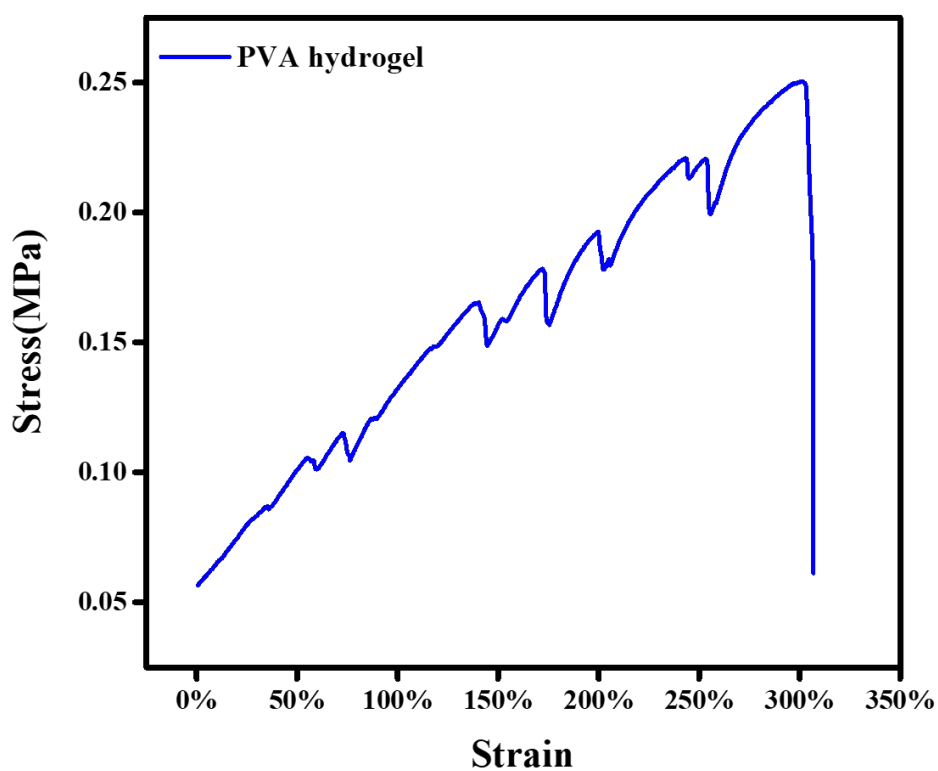

**Figure S3.** Strain-stress curve of the 10% wt PVA hydrogel after three freeze-thaw.

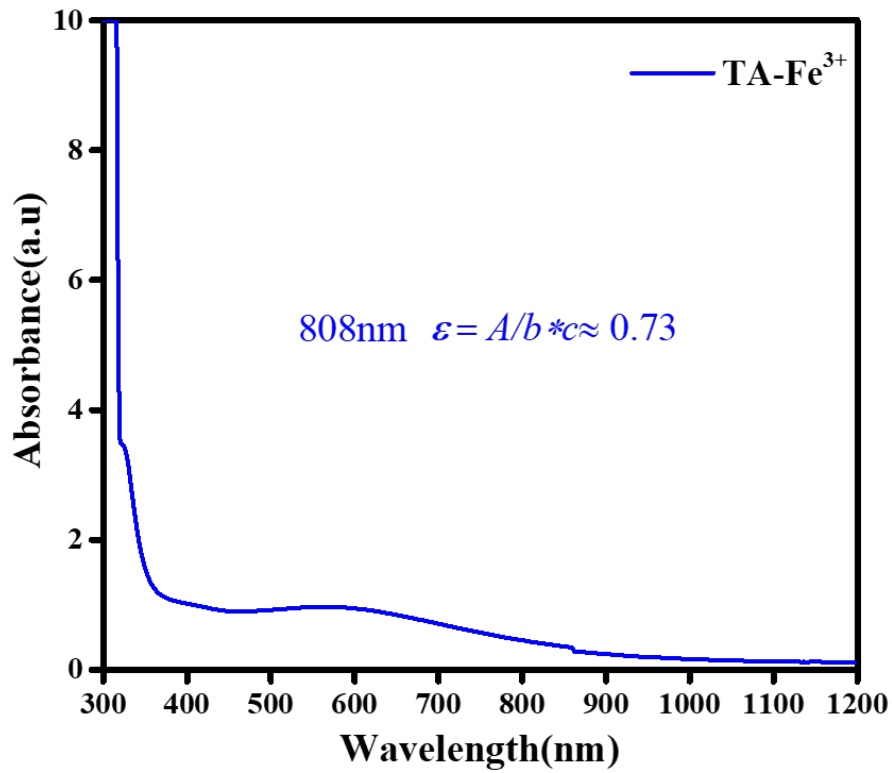

Figure S4. UV-vis-NIR spectrum of TA-Fe<sup>3+</sup> complex solutions.

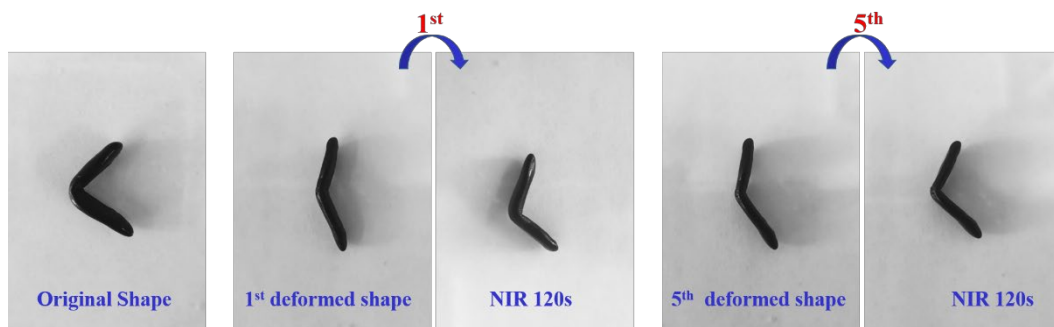

Figure S5. Original shape deformed shape and recovery shape of PVA/TA-Fe<sup>3+</sup> hydrogel after 1 and 5 shape-memory cycles.

**Video S1** is the photothermal response of a PVA/TA-Fe<sup>3+</sup> hydrogel irradiated under 808 nm laser (0.75 W/cm<sup>2</sup>) and the cooling trend after switching off the laser.

**Video S2** for the shape recovery of a PVA/TA-Fe<sup>3+</sup> hydrogel bending deformed into flatting under 808 nm laser (0.75 W/cm<sup>2</sup>) for 120 s.

**Video S3** for the shape recovery of a PVA/TA-Fe<sup>3+</sup> hydrogel strip deformed into a helix under 808 nm laser (0.75 W/cm<sup>2</sup>) for 180 s.
